# Supplementary material for: Formation of manganese phosphate and manganese carbonate during long-term sorption of Mn2+by viable Shewanella putrefaciens: effects of contact time and temperature
Source: Royal Society of Chemistry journal article supplement (doi:10.1039/c4em00634h), 2015-01-01
Supplement: c4em00634h1.pdf [file c4em00634h1.pdf]

*Supplementary information to*

**Formation of manganese phosphate and manganese carbonate during  
long-term sorption of Mn<sup>2+</sup> by viable *Shewanella putrefaciens*:  
effects of contact time and temperature**

by

**Natalia Chubar<sup>1,2\*</sup>, Cristina Avramut<sup>1</sup> and Tom Visser<sup>3</sup>**

<sup>1</sup>Utrecht University, Faculty of Geosciences, Department of Earth Sciences, Budapestlaan 4, 3584  
CD, Utrecht, The Netherlands

<sup>2</sup>Glasgow Caledonian University, School of Engineering and Built Environment, Cowcaddens Road  
70, G4 0BA, Glasgow, United Kingdom

<sup>3</sup>Utrecht University, Faculty of Science, Department of Chemistry, Sorbonnelaan 16, 3584 CA,  
Utrecht, The Netherlands

\*Natalia Chubar: [Natalia.Chubar@gcu.ac.uk](mailto:Natalia.Chubar@gcu.ac.uk)

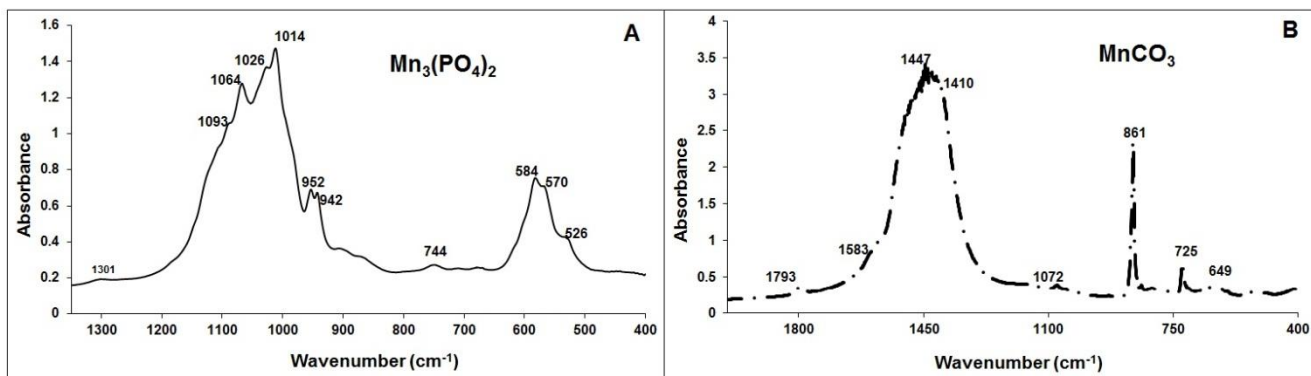

**Fig. 1S** FTIR spectra of the references:  $\text{Mn}_3(\text{PO}_4)_2$  (A) and  $\text{MnCO}_3$  (B).

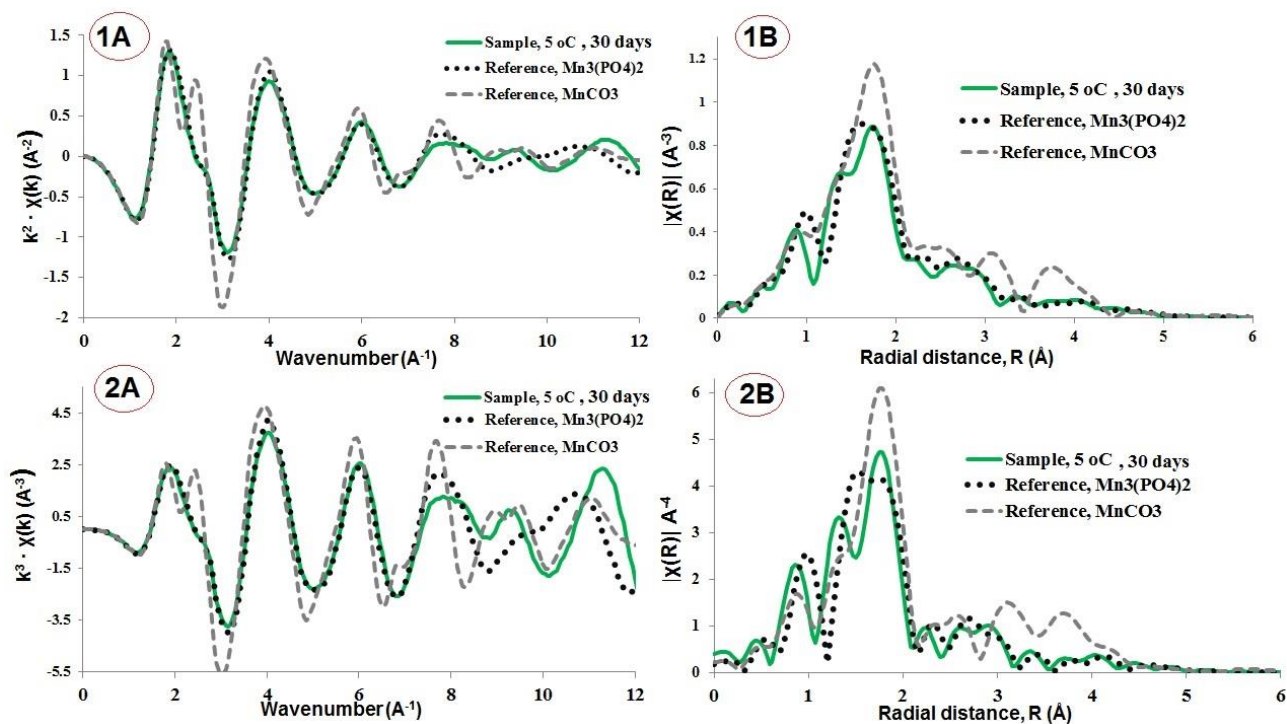

**Fig. 2S**  $k^2$ -weighted (1) and  $k^3$ -weighted (2) Mn K-edge EXAFS spectra (A) and their Fourier Transforms (B) of Mn-containing sample of *Shewanella putrefaciens* contacted to aqueous  $\text{Mn}^{2+}$  at 5 °C for 30 days. This figure is linked to the Fig. 4A of the main body of the article.

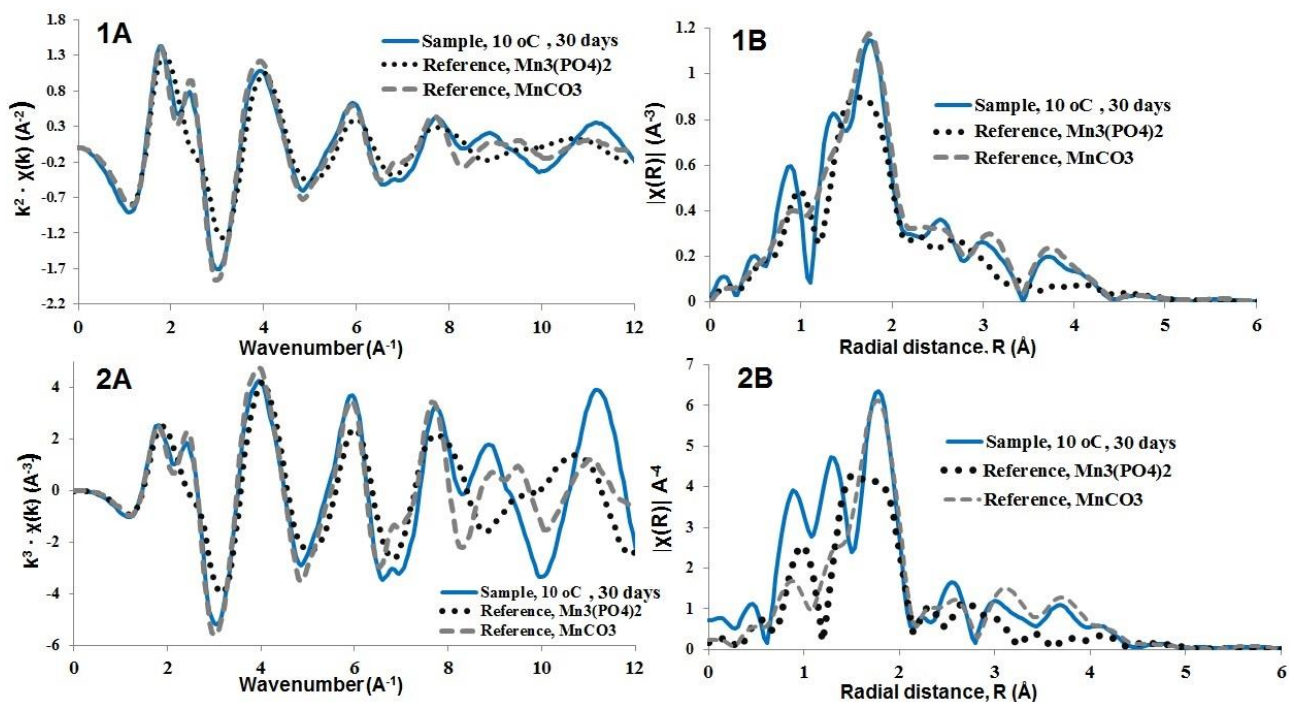

**Fig. 3S**  $k^2$ -weighted (1) and  $k^3$ -weighted (2) Mn K-edge EXAFS spectra (A) and their FTs (B) of Mn-containing sample of *Shewanella putrefaciens* contacted to aqueous  $Mn^{2+}$  at 10 °C for 30 days. This figure is linked to the Fig. 4B of the main body of the article. .

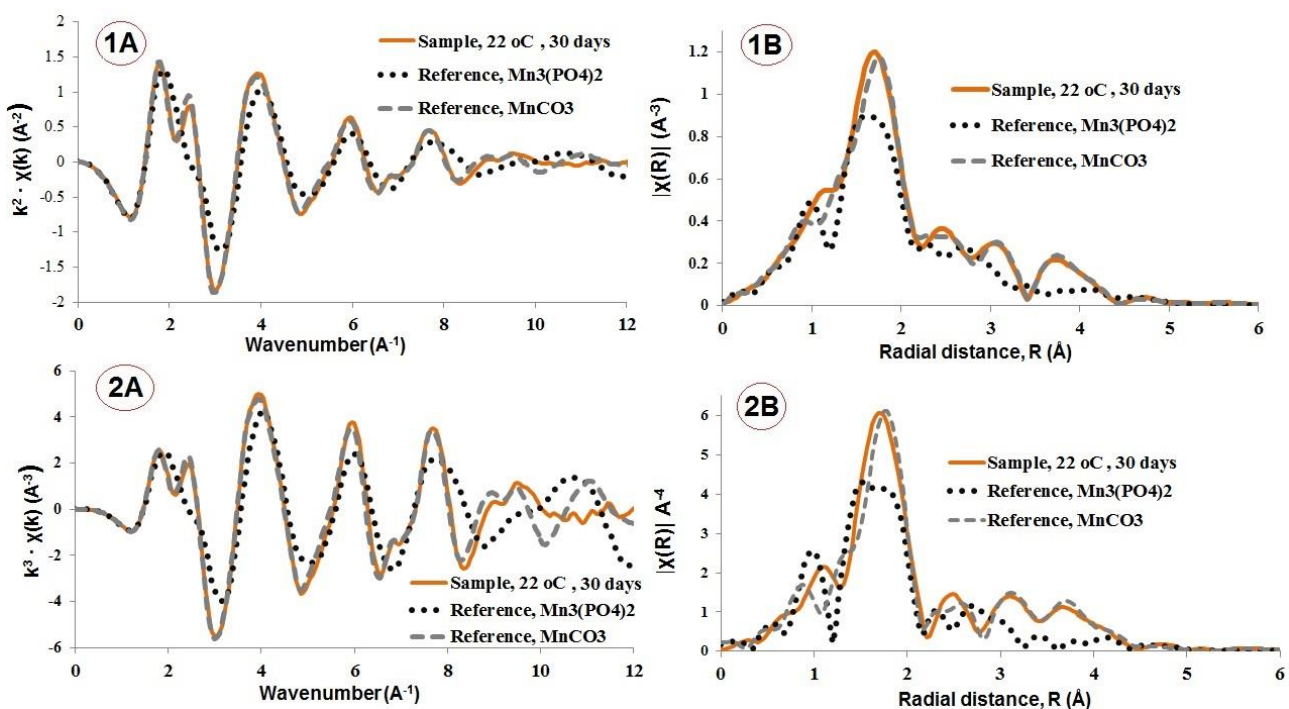

**Fig. 4S**  $k^2$ -weighted (1) and  $k^3$ -weighted (2) Mn K-edge EXAFS spectra (A) and their FTs (B) of Mn-containing sample of *Shewanella putrefaciens* contacted to aqueous  $Mn^{2+}$  at 22 °C for 30 days. This figure is linked to the Fig. 4C of the main body of the article. .

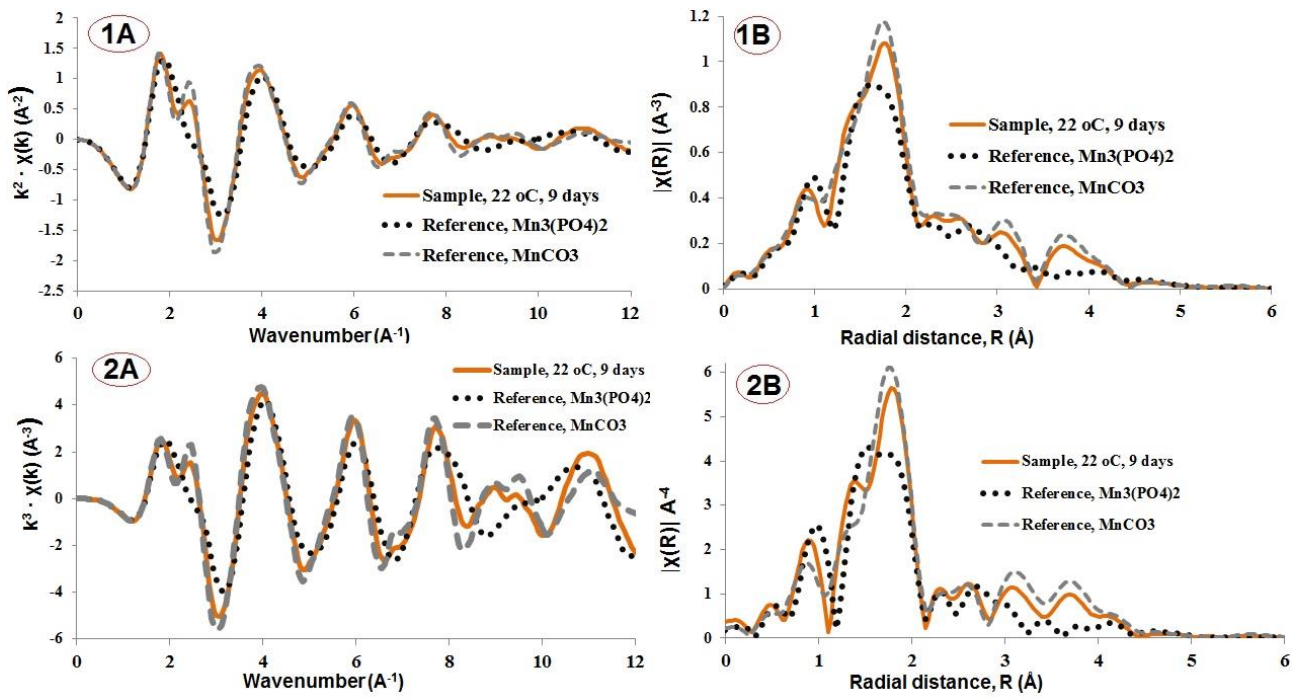

**Fig. 5S**  $k^2$ -weighted (1) and  $k^3$ -weighted (2) Mn K-edge EXAFS spectra (A) and their FTs (B) of Mn-containing sample of *Shewanella putrefaciens* contacted to aqueous  $Mn^{2+}$  at 22 °C for 9 days.

*This figure is linked to the Fig. 5 of the main body of the article.*

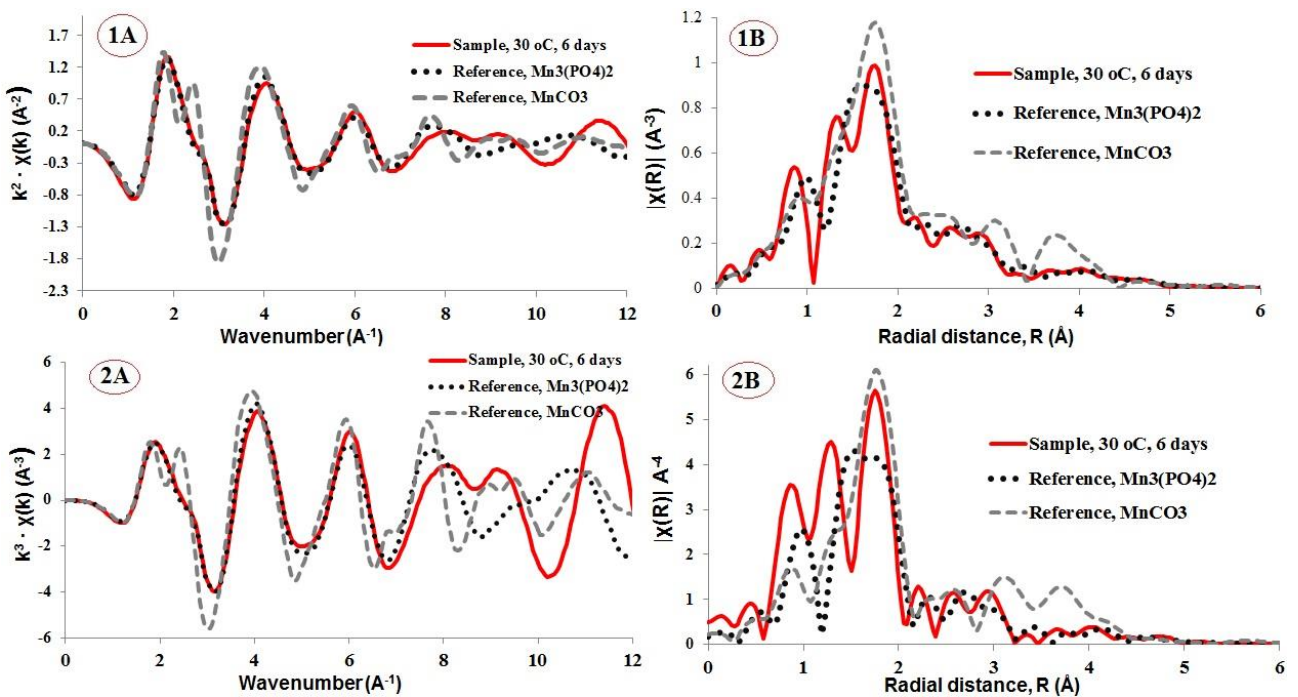

**Fig. 6S**  $k^2$ -weighted (1) and  $k^3$ -weighted (2) Mn K-edge EXAFS spectra (A) and their FTs (B) of Mn-containing sample of *Shewanella putrefaciens* contacted to aqueous  $Mn^{2+}$  at 30 °C for 6 days.

*This figure is linked to the Fig. 6A of the main body of the article.*

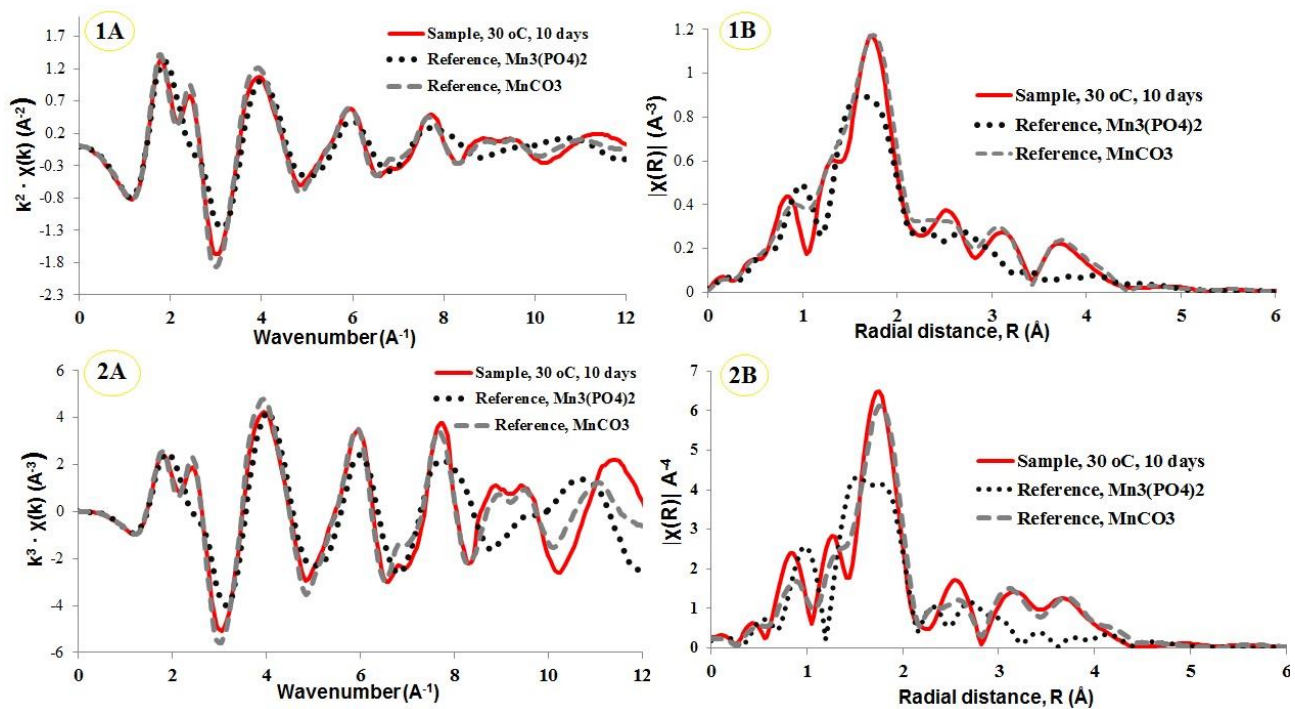

**Fig. 7S**  $k^2$ -weighted (1) and  $k^3$ -weighted (2) Mn K-edge EXAFS spectra (A) and their FTs (B) of Mn-containing sample of *Shewanella putrefaciens* contacted to aqueous  $\text{Mn}^{2+}$  at 30 °C for 10 days. This figure is linked to the Fig. 6B of the main body of the article.
